# Supplementary material
Source: PubMed Central journal article supplement (PMC5034067)

**Regulation of neuronal survival by nucleophosmin 1 (NPM1) is dependent on its expression level, subcellular localization and oligomerization status**

Jason A. Pfister<sup>1</sup> and Santosh R. D'Mello<sup>2</sup>

Department of Molecular and Cell Biology, University of Texas at Dallas, Richardson, TX 75080<sup>1</sup> and  
Department of Biological Sciences, Southern Methodist University, Dallas, TX 75275<sup>2</sup>

S-1. Endogenous NPM1 localizes to the cytoplasm of apoptotic CGNs. *A and B.* CGNs were treated with HK (A) and LK (B) media on day 7 *in vitro* for 24 h. Immunocytochemistry was then performed with an NPM1 antibody. Pictures show representative 20x (A and B, top) fields for each condition. 40x (A and B, bottom) images were taken of regions within white box. Arrows indicate neurites.

A

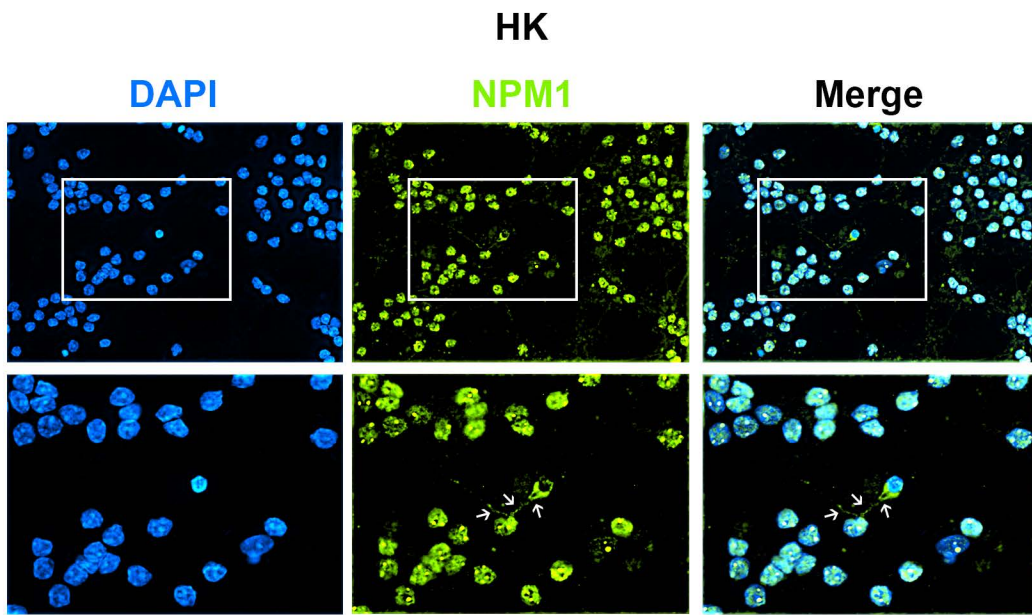

B

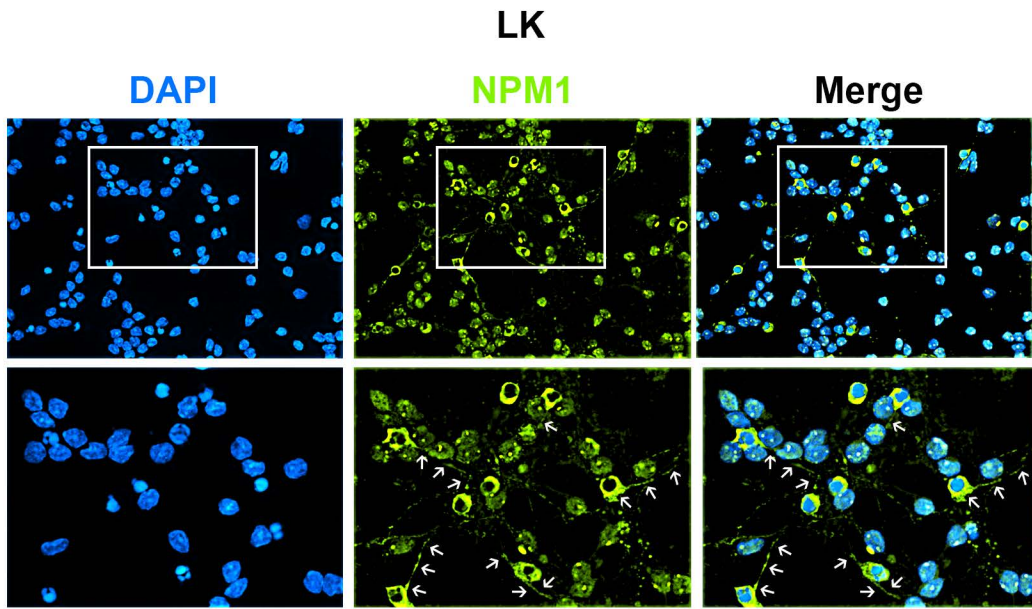

Supplement: 10.1074_M116.723015_jbc.M116.723015-1.pdf [file 10.1074_M116.723015_jbc.M116.723015-1.pdf]
